# Supplementary material for: AnN-oxide-functionalized nanocage-based copper-tricarboxylate framework for the selective capture of C2H2
Source: Royal Society of Chemistry journal article supplement (doi:10.1039/d0dt03067h), 2020-01-01
Supplement: d0dt03067h1.pdf [file d0dt03067h1.pdf]

**A *N*-oxide-functionalized nanocage-based copper-tricarboxylate framework for selective capture of C<sub>2</sub>H<sub>2</sub>**

Zhenzhen Jiang,<sup>a</sup> Lihui Fan,<sup>a</sup> Ping Zhou,<sup>a</sup> Tingting Xu,<sup>a</sup> Jingxian Chen,<sup>a</sup> Simin Hu,<sup>a</sup> De-Li Chen<sup>\*b</sup> and Yabing He<sup>\*a</sup>

<sup>a</sup> Key Laboratory of the Ministry of Education for Advanced Catalysis Materials, College of Chemistry and Life Sciences, Zhejiang Normal University, Jinhua 321004, China. E-mail: heyabing@zjnu.cn

<sup>b</sup> Key Laboratory of the Ministry of Education for Advanced Catalysis Materials, Institute of Physical Chemistry, Zhejiang Normal University, Jinhua 321004, China. E-mail: chendl@zjnu.cn

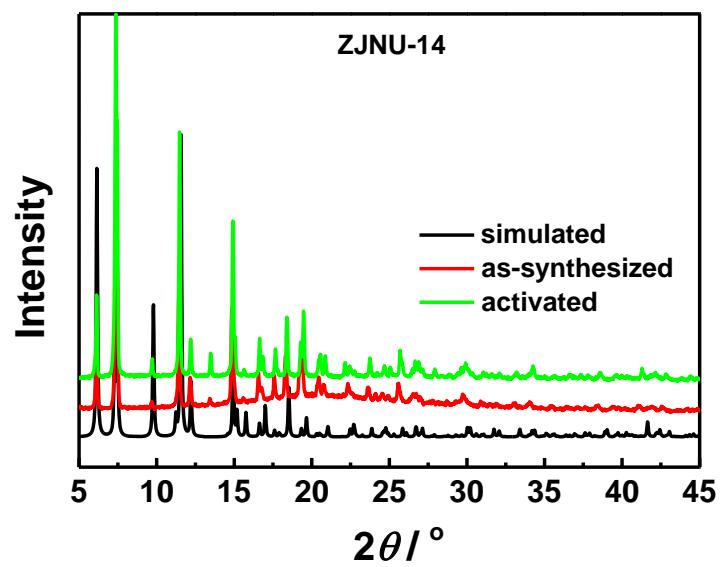

**Fig. S1** PXRD patterns of ZJNU-14

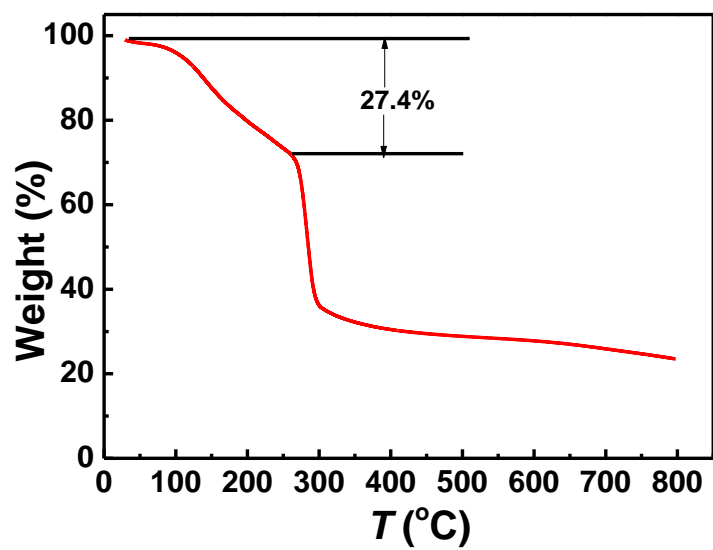

**Fig. S2** TGA curve of as-synthesized **ZJNU-14** under N<sub>2</sub> atmosphere

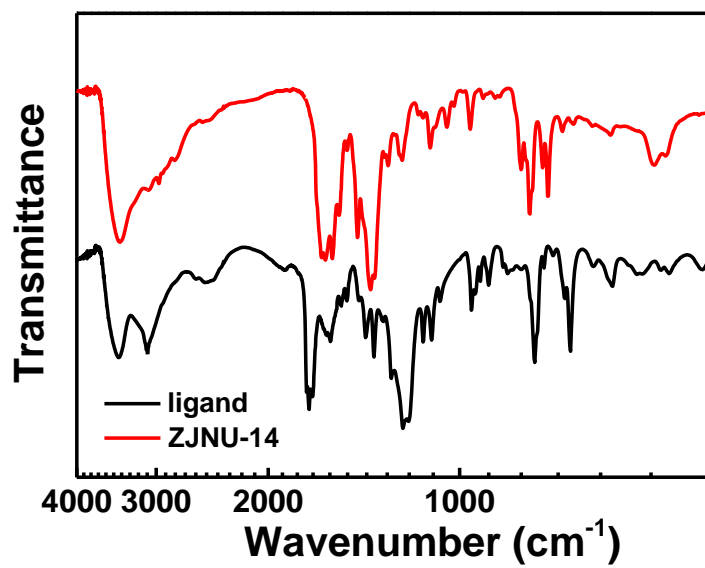

**Fig. S3** Comparison of FTIR spectra of the ligand (black) and as-synthesized ZJNU-14 (red).

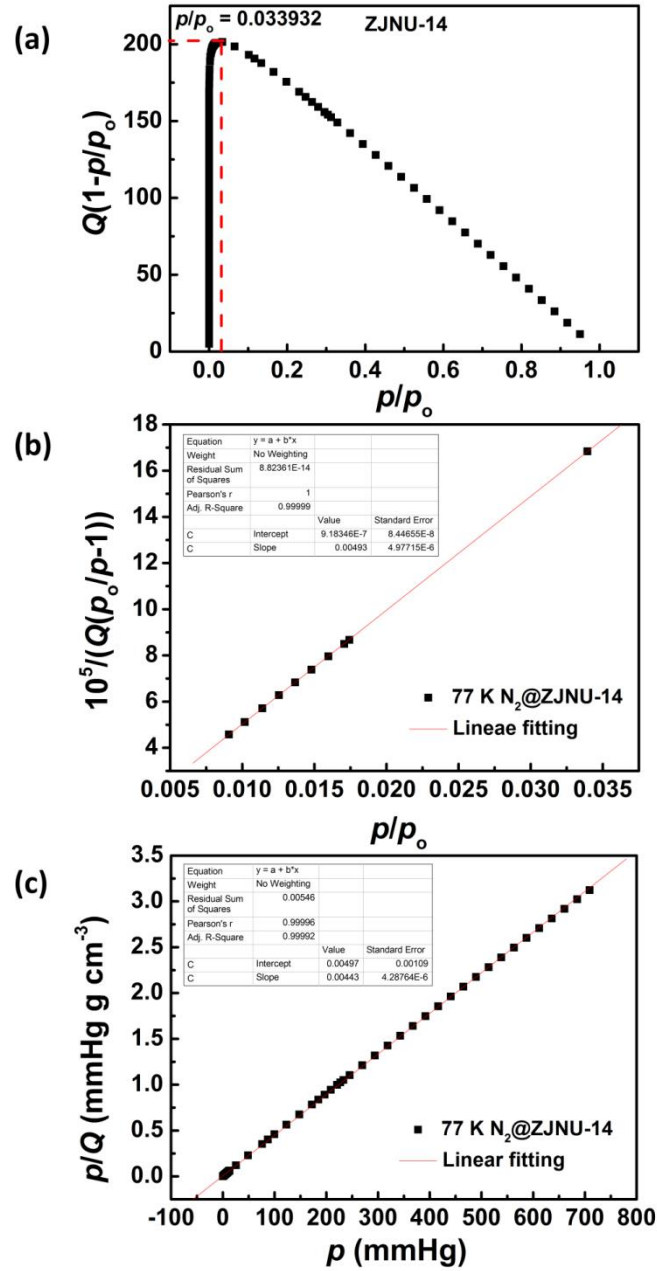

$$S_{\text{BET}} = 1/(9.18346 \times 10^{-7} + 0.00493)/22414 \times 6.023 \times 10^{23} \times 0.162 \times 10^{-18} = 883 \text{ m}^2 \text{ g}^{-1}$$

$$S_{\text{Langmuir}} = (1/0.00443)/22414 \times 6.023 \times 10^{23} \times 0.162 \times 10^{-18} = 983 \text{ m}^2 \text{ g}^{-1}$$

$$\text{BET constant } C = 1 + 0.00493/9.18346 \times 10^{-7} = 5369$$

$$(p/p_o)_{n_m} = \frac{1}{\sqrt{C+1}} = 0.013463$$

**Fig. S4** The consistency plot (a), BET surface area plot (b), and Langmuir surface area plot (c) for ZJNU-14.

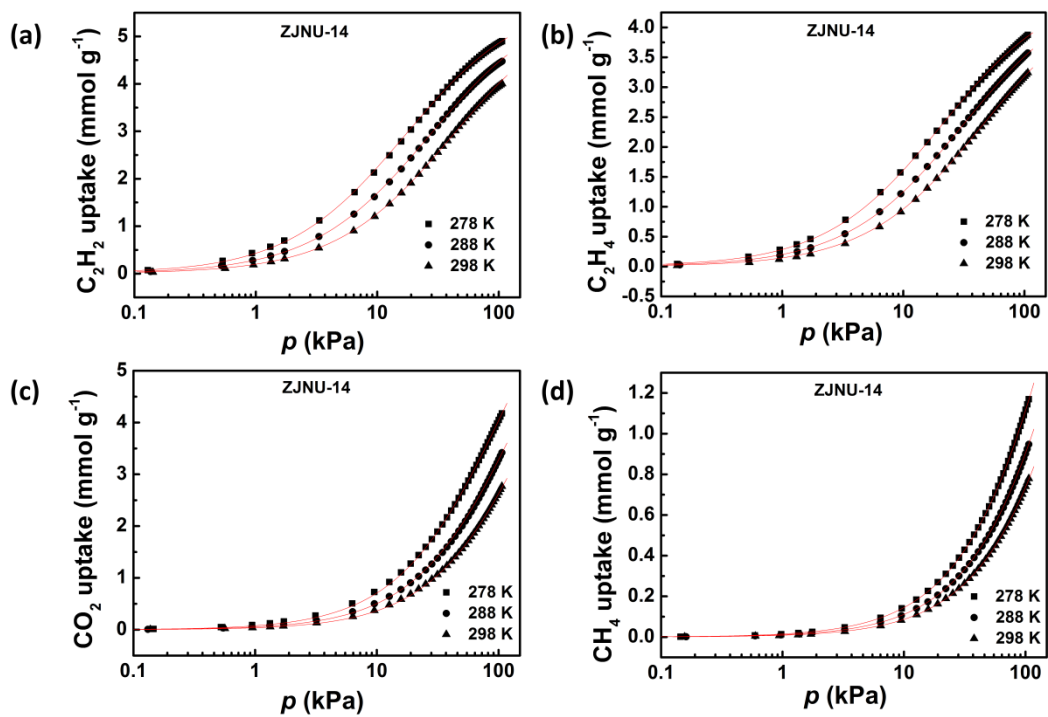

**Fig. S5** Comparison of the pure-component isotherm data for (a) C<sub>2</sub>H<sub>2</sub>, (b) C<sub>2</sub>H<sub>4</sub>, (c) CO<sub>2</sub>, and (d) CH<sub>4</sub> in **ZJNU-14** with the fitted isotherms at 278 K, 288 K, and 298 K.

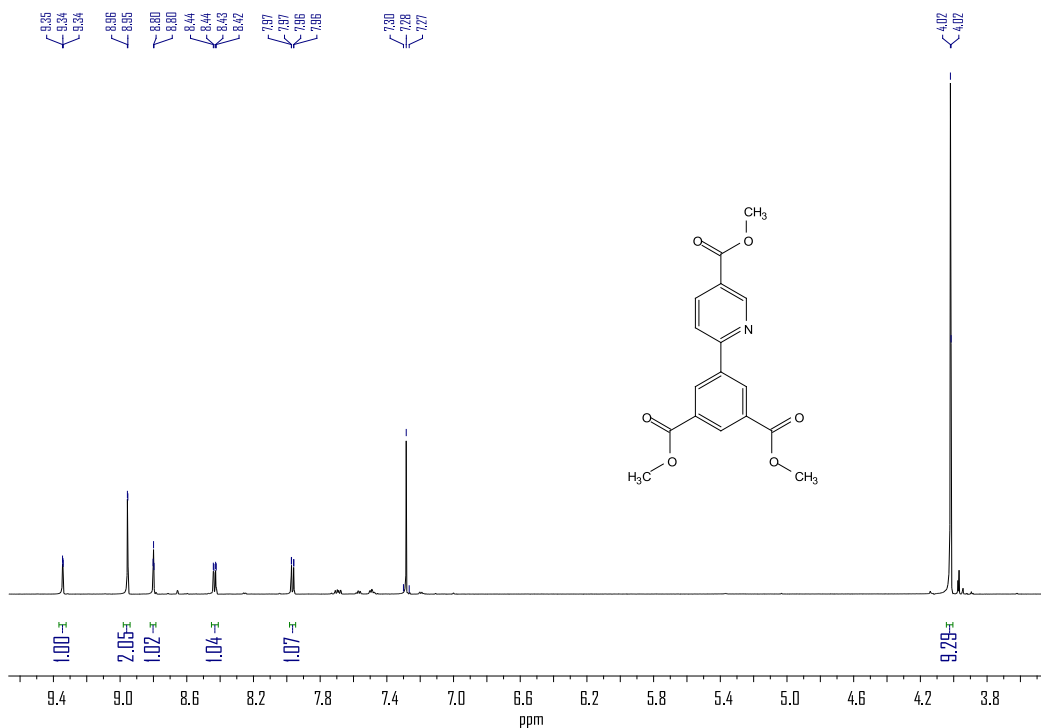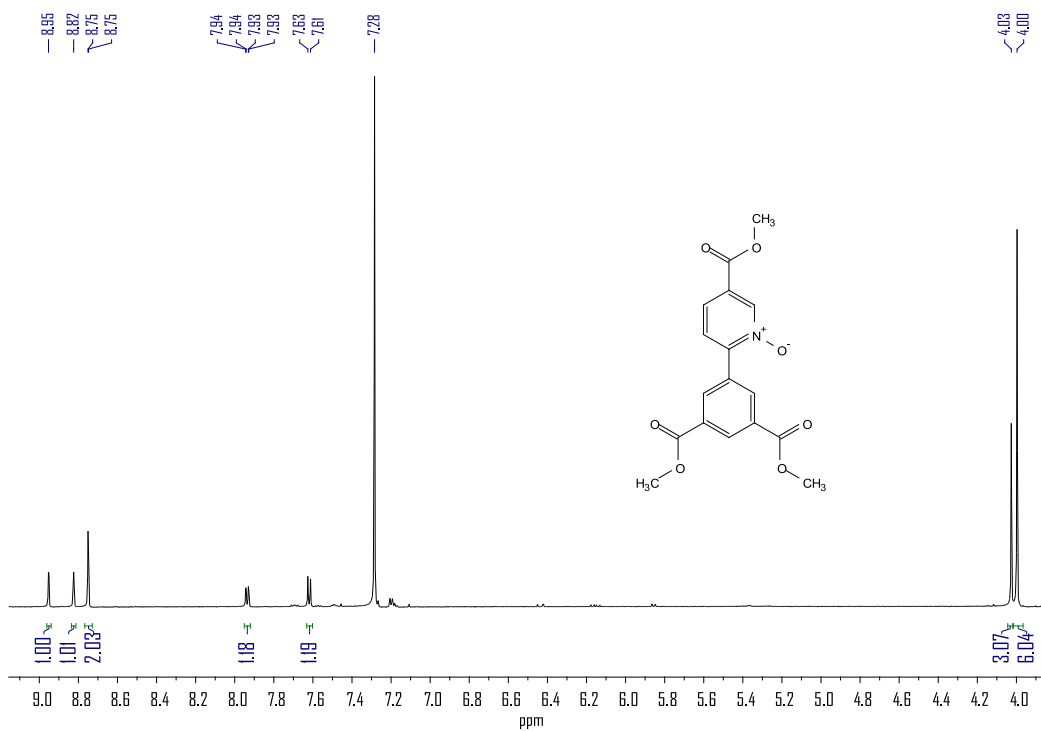

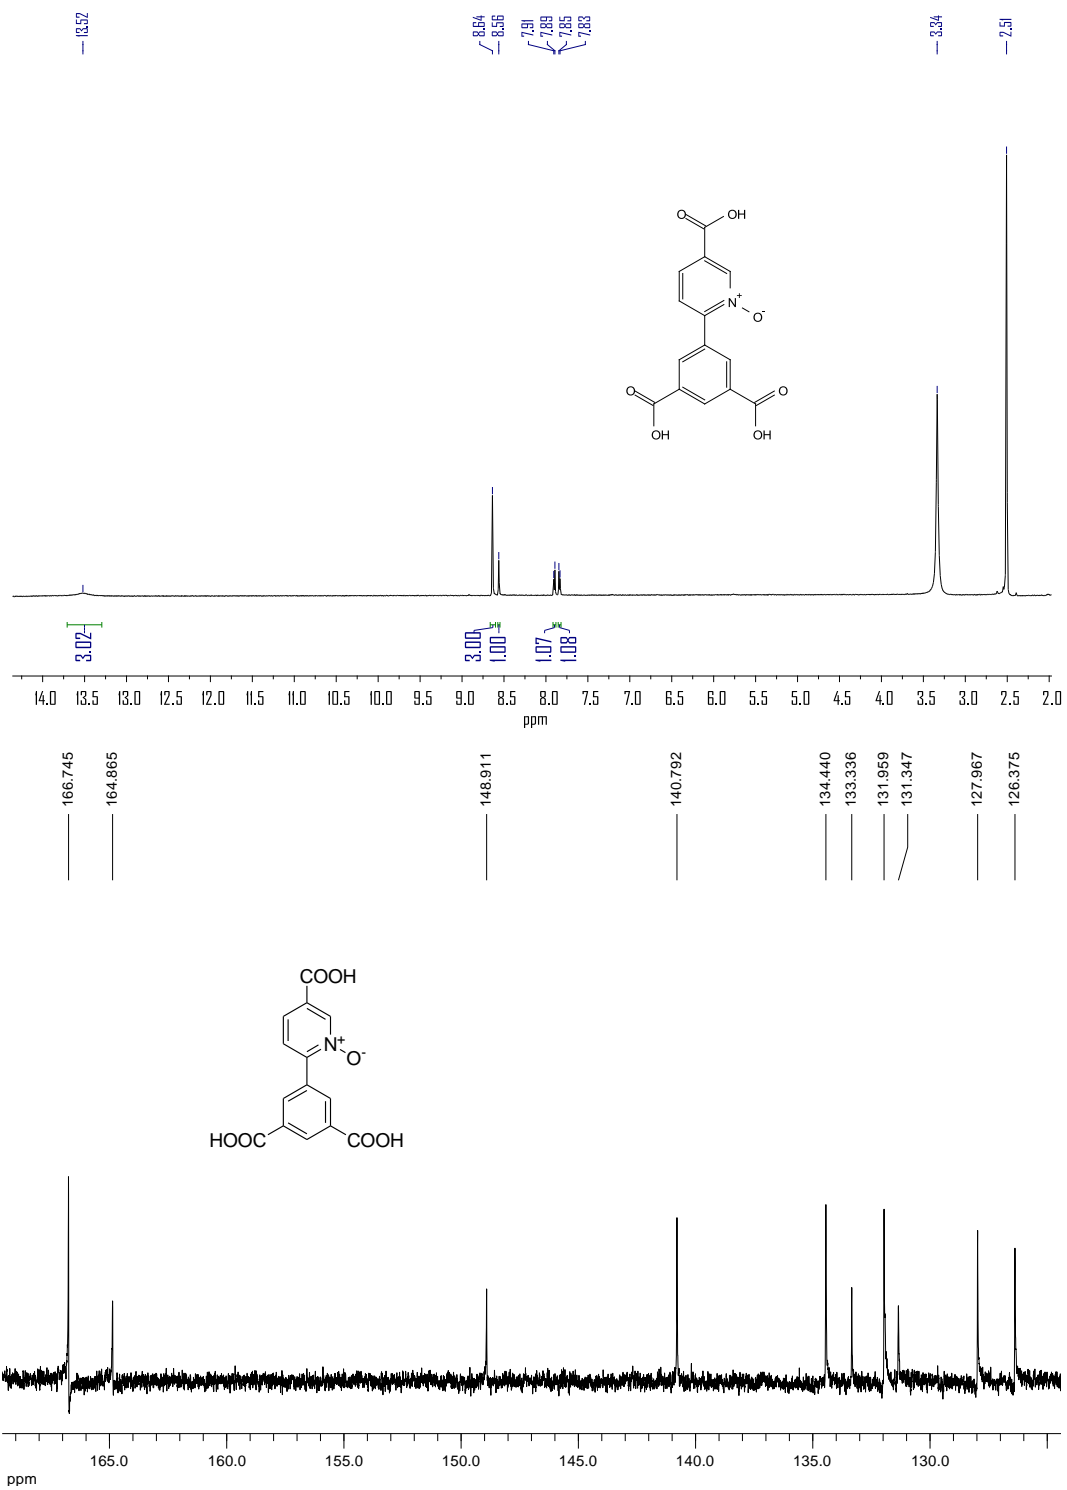

**Fig. S6** <sup>1</sup>H and <sup>13</sup>C NMR spectra.



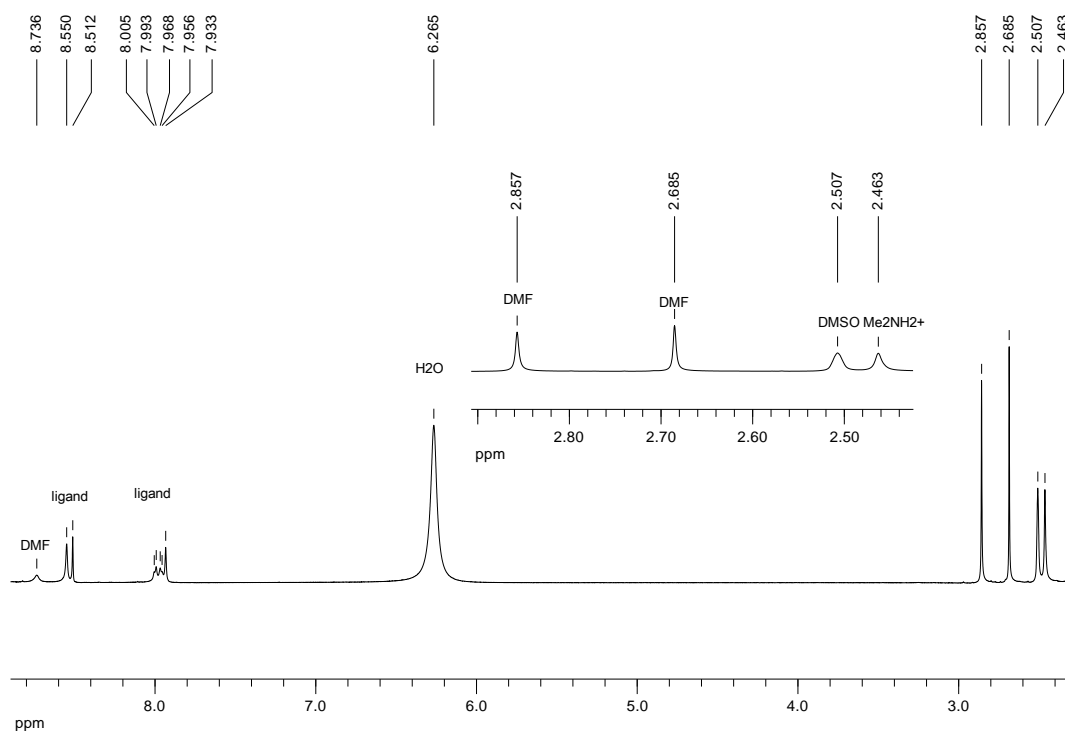

**Fig. S7**  $^1\text{H}$  NMR spectrum of HCl-digested **ZJNU-14** in  $\text{DMSO-}d_6$

**Table S1** Crystal data and structure refinement for **ZJNU-14**.

| MOF                                                           | ZJNU-14                                                                                                                              |
|---------------------------------------------------------------|--------------------------------------------------------------------------------------------------------------------------------------|
| Empirical formula                                             | C <sub>19</sub> H <sub>23</sub> CuN <sub>3</sub> O <sub>9</sub>                                                                      |
| Formula weight                                                | 500.94                                                                                                                               |
| Temperature (K)                                               | 150(2)                                                                                                                               |
| $\lambda$ (Å)                                                 | 0.71073                                                                                                                              |
| Crystal system                                                | Trigonal                                                                                                                             |
| Space group                                                   | <i>R</i> 32: <i>H</i>                                                                                                                |
| Unit cell dimensions                                          | $a = 18.0487(5)$ Å<br>$b = 18.0487(5)$ Å<br>$c = 36.3959(11)$ Å<br>$\alpha = 90^\circ$<br>$\beta = 90^\circ$<br>$\gamma = 120^\circ$ |
| $V$ (Å <sup>3</sup> )                                         | 10267.7(6)                                                                                                                           |
| $Z$                                                           | 18                                                                                                                                   |
| $D_c$ (g cm <sup>-3</sup> )                                   | 1.458                                                                                                                                |
| $\mu$ (mm <sup>-1</sup> )                                     | 1.010                                                                                                                                |
| $F(000)$                                                      | 4662                                                                                                                                 |
| $\theta$ range for data collection (°)                        | 2.257 to 27.484                                                                                                                      |
| Limiting indices                                              | $-20 \leq h \leq 23$<br>$-22 \leq k \leq 22$<br>$-38 \leq l \leq 47$                                                                 |
| Reflections collected / unique                                | 21204 / 5231                                                                                                                         |
| $R_{\text{int}}$                                              | 0.0287                                                                                                                               |
| Max. and min. transmission                                    | 0.898 and 0.879                                                                                                                      |
| Refinement method                                             | Full-matrix least-squares on $F^2$                                                                                                   |
| Data/restraints/parameters                                    | 5231 / 0 / 209                                                                                                                       |
| Goodness-of-fit on $F^2$                                      | 1.004                                                                                                                                |
| Final $R$ indices [ $I > 2\sigma(I)$ ]                        | $R_1 = 0.0241$<br>$wR_2 = 0.0669$                                                                                                    |
| $R$ indices (all data)                                        | $R_1 = 0.026$<br>$wR_2 = 0.0682$                                                                                                     |
| Largest diff. peak and hole (e <sup>-</sup> Å <sup>-3</sup> ) | 0.635 and -0.201                                                                                                                     |
| CCDC                                                          | 2017484                                                                                                                              |

**Table S2** Summarizes of physical parameters of C<sub>2</sub>H<sub>2</sub>, C<sub>2</sub>H<sub>4</sub>, CO<sub>2</sub>, and CH<sub>4</sub>

| Adsorbates                    | BP<br>(K) | $T_c$<br>(K) | $p_c$<br>(bar) | Kinetic<br>diameter<br>(Å) | Molecular<br>dimension<br>(Å) | Polarizability<br>( $\times 10^{25}$ cm <sup>3</sup> ) | Dipole moment<br>( $\times 10^{18}$ esu cm) | Quadruple moment<br>( $\times 10^{26}$ esu cm <sup>2</sup> ) |
|-------------------------------|-----------|--------------|----------------|----------------------------|-------------------------------|--------------------------------------------------------|---------------------------------------------|--------------------------------------------------------------|
| C <sub>2</sub> H <sub>2</sub> | 188.40    | 308.30       | 61.14          | 3.3                        | 3.3×3.3×5.7                   | 33.3-39.3                                              | 0                                           | +7.5                                                         |
| C <sub>2</sub> H <sub>4</sub> | 169.42    | 282.34       | 50.41          | 4.163                      | 3.3×4.2×4.8                   | 42.52                                                  | 0                                           | +1.50                                                        |
| CO <sub>2</sub>               | 194.65    | 304.12       | 73.74          | 3.3                        | 3.2×3.3×5.4                   | 29.11                                                  | 0                                           | -4.3                                                         |
| CH <sub>4</sub>               | 111.66    | 190.56       | 45.99          | 3.758                      | 3.7×3.7×3.7                   | 25.93                                                  | 0                                           | 0                                                            |

BP: normal boiling point;  $T_c$ : critical temperature;  $p_c$ : critical pressure

**Table S3** Langmuir-Freundlich parameters for adsorption of C<sub>2</sub>H<sub>2</sub>, C<sub>2</sub>H<sub>4</sub>, CO<sub>2</sub>, and CH<sub>4</sub> in ZJNU-14.

| Adsorbates                    | $q_{\text{sat}}$<br>(mmol g <sup>-1</sup> ) | $b_0$<br>(kPa) <sup>-<math>\nu</math></sup> | $E$<br>(kJ mol <sup>-1</sup> ) | $\nu$   | $R^2$   |
|-------------------------------|---------------------------------------------|---------------------------------------------|--------------------------------|---------|---------|
| C <sub>2</sub> H <sub>2</sub> | 5.85747                                     | 4.51642×10 <sup>-7</sup>                    | 27.904                         | 0.89438 | 0.99979 |
| C <sub>2</sub> H <sub>4</sub> | 4.7228                                      | 1.78752×10 <sup>-6</sup>                    | 24.253                         | 0.9055  | 0.99993 |
| CO <sub>2</sub>               | 8.45182                                     | 2.41297×10 <sup>-7</sup>                    | 24.365                         | 1       | 0.99973 |
| CH <sub>4</sub>               | 4.30221                                     | 1.37872×10 <sup>-6</sup>                    | 18.112                         | 1       | 0.99995 |

**Table S4** Summaries of gas adsorption properties of **ZJNU-14**

| <b>ZJNU-14</b>                                                          |                                                                             | 298 K    | 288 K | 278 K |
|-------------------------------------------------------------------------|-----------------------------------------------------------------------------|----------|-------|-------|
| Uptake capacity <sup>a</sup><br>(cm <sup>3</sup> g <sup>-1</sup> , STP) | C <sub>2</sub> H <sub>2</sub>                                               | 89.7     | 100.3 | 109.8 |
|                                                                         | C <sub>2</sub> H <sub>4</sub>                                               | 72.7     | 80.1  | 86.9  |
|                                                                         | CO <sub>2</sub>                                                             | 62.1     | 76.6  | 93.6  |
|                                                                         | CH <sub>4</sub>                                                             | 17.5     | 21.2  | 26.2  |
| IAST adsorption selectivity <sup>a</sup>                                | C <sub>2</sub> H <sub>2</sub> /C <sub>2</sub> H <sub>4</sub><br>(v/v, 1/1)  | 1.63     | 1.81  | 2.05  |
|                                                                         | C <sub>2</sub> H <sub>2</sub> /C <sub>2</sub> H <sub>4</sub><br>(v/v, 1/99) | 1.59     | 1.75  | 1.95  |
|                                                                         | C <sub>2</sub> H <sub>2</sub> /CO <sub>2</sub><br>(v/v, 1/1)                | 3.42     | 3.46  | 3.48  |
|                                                                         | C <sub>2</sub> H <sub>2</sub> /CH <sub>4</sub><br>(v/v, 1/1)                | 21.9     | 27.3  | 35.4  |
| $Q_{st}^b$<br>(kJ mol <sup>-1</sup> )                                   | C <sub>2</sub> H <sub>2</sub>                                               | 35.0±0.3 |       |       |
|                                                                         | C <sub>2</sub> H <sub>4</sub>                                               | 31.5±0.1 |       |       |
|                                                                         | CO <sub>2</sub>                                                             | 28.1±0.7 |       |       |
|                                                                         | CH <sub>4</sub>                                                             | 19.2±0.7 |       |       |

<sup>a</sup> at 1 atm; <sup>b</sup> at near zero surface coverage; STP = standard temperature and pressure
